# Supplementary material for: SOX9 is a dose-dependent metastatic fate determinant in melanoma
Source: PubMed Central journal article supplement (PMC6330758; doi:10.1186/s13046-018-0998-6), 2019-01-14

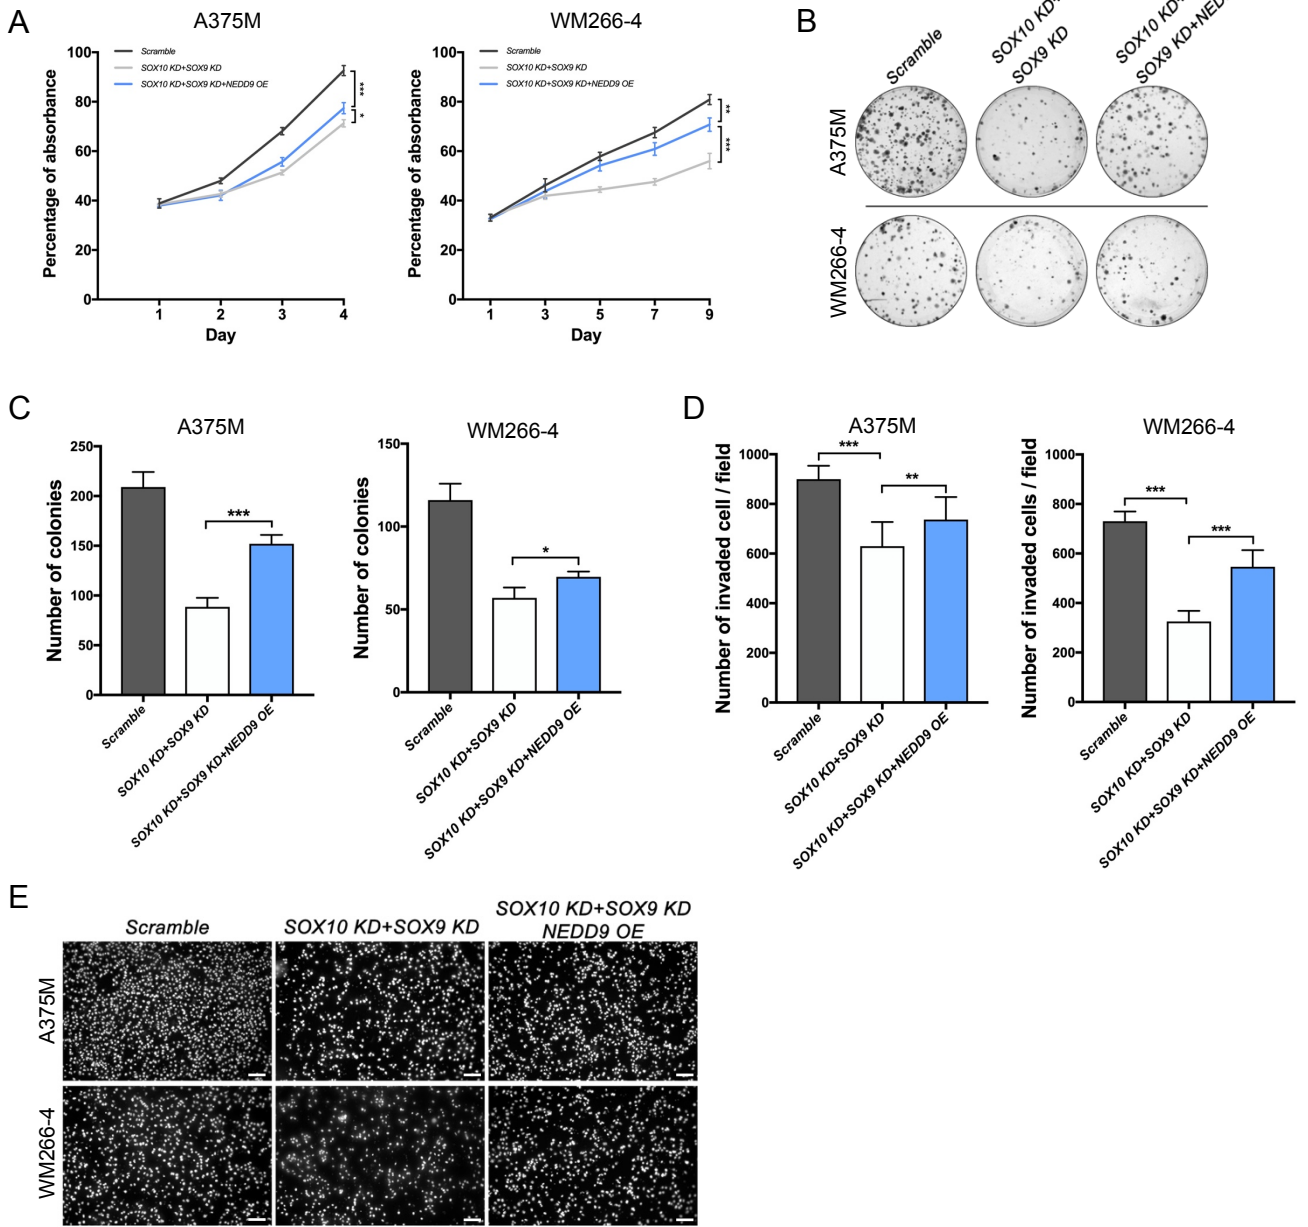

Supplement: 13046_2018_998_MOESM1_ESM.pdf [file 13046_2018_998_MOESM1_ESM.pdf]
